# Supplementary material
Source: PubMed Central journal article supplement (PMC5899627)
Supplement: NIHMS932524-supplement-Supp_DataS1.pdf [file NIHMS932524-supplement-Supp_DataS1.pdf]

1  
2  
3  
4  
5  
6  
7  
8  
9  
10  
11  
12  
13  
14  
15  
16  
17  
18  
19  
20  
21  
22  
23  
24  
25  
26  
27  
28  
29  
30  
31  
32  
33  
34  
35  
36  
37  
38  
39  
40  
41  
42  
43  
44  
45  
46  
47  
48  
49  
50  
51  
52  
53  
54  
55  
56  
57  
58  
59  
60

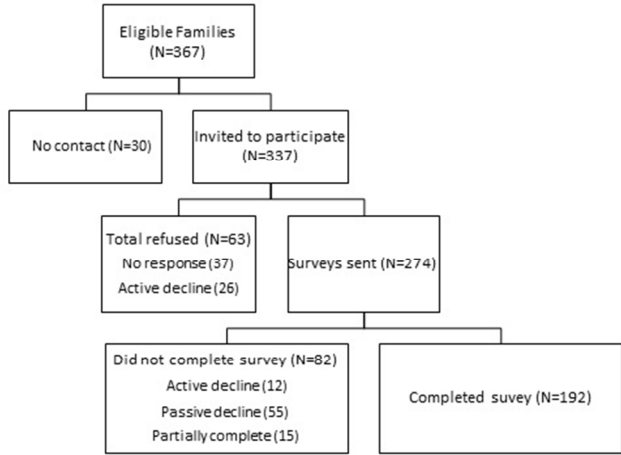

203x162mm (96 x 96 DPI)

only

**Table S1.** Survey measures

| <b>Measure</b>                                                      | <b>Analysis</b> | <b>Interpretation</b>                               | <b>Cronbach <math>\alpha</math></b> |
|---------------------------------------------------------------------|-----------------|-----------------------------------------------------|-------------------------------------|
| Internal Health Locus of Control (IHLC)                             | Continuous      | Higher score= Greater perceived control over health | 0.75                                |
| Healthy Behaviors (HB)                                              | Continuous      | Higher score= Poorer health behavior                | 0.85                                |
| Personal Health Questionnaire (PHQ-9)                               | Binary          | $\geq 10$ Depressed                                 | 0.92                                |
| Generalized Anxiety Disorder 7 Item (GAD-7)                         | Binary          | $\geq 10$ Anxious                                   | 0.93                                |
| Decision Regret Scale (DRS)                                         | Binary          | 1= Regret                                           | 0.80                                |
| Genetic Counseling Satisfaction Scale (GCSS)                        | Binary          | 1= Satisfied with genetic counseling                | 0.91                                |
| Adapted* Multidimensional Impact of Cancer Risk Assessment (aMICRA) | Continuous      | Higher score = Greater impact of results            | 0.89                                |
| aMICRA Uncertainty subdomain                                        | Continuous      | Higher score = More uncertainty                     |                                     |
| aMICRA Distress subdomain                                           | Continuous      | Higher score = More distress                        |                                     |
| aMICRA Positivity subdomain                                         | Continuous      | Higher score = Lower positivity                     |                                     |

For Review Only

**Table 2.** Interpretation of exome sequencing results. Clinician interpretation compared to laboratory test report. Parental interpretation of child's results compared to clinician interpretation. N and column %.

| <b>Laboratory Report of Exome Sequencing Results</b> |                 |          |                  |          |                 |          |              |
|------------------------------------------------------|-----------------|----------|------------------|----------|-----------------|----------|--------------|
| <b>Clinician Interpretation</b>                      | <b>Positive</b> |          | <b>Uncertain</b> |          | <b>Negative</b> |          | <b>Total</b> |
|                                                      | <b>N</b>        | <b>%</b> | <b>N</b>         | <b>%</b> | <b>N</b>        | <b>%</b> | <b>N</b>     |
| <b>Positive</b>                                      | 63              | 95%      | 16               | 31%      | 0               | 0%       | 79           |
| <b>Uncertain</b>                                     | 3               | 5%       | 26               | 51%      | 6               | 8%       | 35           |
| <b>Negative</b>                                      | 0               | 0%       | 9                | 18%      | 69              | 92%      | 78           |
| <b>Total</b>                                         | 66              |          | 51               |          | 75              |          | 192          |

  

| <b>Clinician Interpretation of Exome Sequencing Results</b> |                 |          |                  |          |                 |          |              |
|-------------------------------------------------------------|-----------------|----------|------------------|----------|-----------------|----------|--------------|
| <b>Parental Interpretation</b>                              | <b>Positive</b> |          | <b>Uncertain</b> |          | <b>Negative</b> |          | <b>Total</b> |
|                                                             | <b>N</b>        | <b>%</b> | <b>N</b>         | <b>%</b> | <b>N</b>        | <b>%</b> | <b>N</b>     |
| <b>Positive</b>                                             | 70              | 89%      | 4                | 11%      | 2               | 3%       | 76           |
| <b>Uncertain</b>                                            | 8               | 10%      | 25               | 71%      | 13              | 17%      | 46           |
| <b>Negative</b>                                             | 1               | 1%       | 5                | 14%      | 56              | 72%      | 62           |
| <b>Blank</b>                                                | 0               | 0%       | 1                | 3%       | 7               | 9%       | 8            |
| <b>Total</b>                                                | 79              |          | 35               |          | 78              |          | 192          |

**Table S3. Parental report of process of decision to have CES and receiving results. N, %**

**Which medical professionals did you speak with to learn about CES and make the decision to have CES for your child?**

|                       |     |     |
|-----------------------|-----|-----|
| Geneticist            | 142 | 74% |
| Genetic Counselor     | 113 | 59% |
| Pediatrician          | 6   | 3%  |
| Primary Care Provider | 32  | 17% |
| Cardiologist          | 18  | 9%  |
| Nurse                 | 25  | 13% |
| Oncologist            | 8   | 4%  |
| Neurologist           | 7   | 4%  |
| Other*                | 48  | 25% |

\* Dermatologist, obstetrician, orthopedist, hepatologist, ophthalmologist, rheumatologist, pulmonologist

**What other resources outside of your doctors or health care providers did you use to learn more about CES**

|                       |     |     |
|-----------------------|-----|-----|
| Internet search       | 38  | 20% |
| Educational Materials | 11  | 6%  |
| Educational Websites  | 102 | 53% |
| Friends               | 20  | 10% |
| Book                  | 8   | 4%  |
| Educational Videos    | 4   | 2%  |
| Other*                | 9   | 5%  |

\*Relative/ friend in medical or science industry, parent support group, Jewish Genetics organization (Bonei Olam)

**How much time did you spend discussing CES testing with your child's health care provider(s) before deciding to have CES for your child**

|                 |    |     |
|-----------------|----|-----|
| <15 minutes     | 31 | 16% |
| 15-30 minutes   | 50 | 26% |
| 30-60 minutes   | 45 | 23% |
| >1 hour         | 39 | 20% |
| Cannot remember | 23 | 12% |

**How much money did you personally have to pay out of pocket to have CES for your child?**

|                 |     |     |
|-----------------|-----|-----|
| No cost         | 119 | 62% |
| <\$100          | 18  | 9%  |
| \$100-\$1000    | 19  | 10% |
| >\$1000         | 9   | 5%  |
| Cannot remember | 18  | 9%  |

**Before your child had CES, had he/she had any other genetic testing for the medical condition?**

|                 |     |     |
|-----------------|-----|-----|
| Yes             | 118 | 61% |
| No              | 62  | 32% |
| Cannot remember | 12  | 6%  |

**How did you FIRST learn about the CES test results?**

|                 |     |     |
|-----------------|-----|-----|
| Phone           | 103 | 54% |
| In person       | 13  | 7%  |
| Letter          | 30  | 16% |
| Cannot remember | 45  | 23% |

Abbreviations: Clinical Exome Sequencing (CES)

**Table S4a.** Frequency of parent incorrectly interpreting child's CES results by categorical variables of interpretation of results, demographics, testing experience and parental psychology.

| Variable                                      | Category         | % Incorrect | p-value     |
|-----------------------------------------------|------------------|-------------|-------------|
| <b>All</b>                                    |                  | <b>21%</b>  |             |
| Parental Intp. of CES Results                 | Positive         | 11%         | <b>0.02</b> |
|                                               | Uncertain        | 29%         |             |
|                                               | Negative         | 28%         |             |
| Parental Gender                               | Male             | 25%         | 0.64        |
|                                               | Female           | 21%         |             |
| Child Gender                                  | Male             | 24%         | 0.36        |
|                                               | Female           | 18%         |             |
| Marital status                                | Married          | 22%         | 0.90        |
|                                               | Unmarried        | 23%         |             |
| Race/ Ethnicity                               | Non-White        | 21%         | 0.99        |
|                                               | White            | 21%         |             |
| Education                                     | < College        | 24%         | 0.59        |
|                                               | ≥ College        | 25%         |             |
| Employment                                    | Employed         | 20%         | 0.70        |
|                                               | Unemployed       | 23%         |             |
| Medical Geneticist                            | MD 1             | 22%         | 0.59        |
|                                               | MD 2             | 18%         |             |
|                                               | Others           | 37%         |             |
| Genetic Counselor Experience*                 | ≥ 5yr            | 22%         | 0.72        |
|                                               | < 5yr            | 19%         |             |
| Cost                                          | No cost          | 16%         | 0.05        |
|                                               | Cost             | 28%         |             |
| Location                                      | Clinic           | 20%         | 0.56        |
|                                               | In patient       | 24%         |             |
| Results Disclosure                            | Phone            | 22%         | 0.75        |
|                                               | Other            | 20%         |             |
| Indication                                    | Single System    | 22%         | 0.89        |
|                                               | Multiple Systems | 18%         |             |
|                                               | Neurological     | 22%         |             |
| Decision Regret Scale (DRS)                   | Regret           | 31%         | 0.12        |
|                                               | No Regret        | 24%         |             |
| Genetic Counseling Satisfaction Scale (GCSS)* | Regret           | 24%         | 0.48        |
|                                               | No Regret        | 19%         |             |
| Personal Health Questionnaire (PHQ-9)         | Not Depressed    | 18%         | 0.14        |
|                                               | Depressed        | 32%         |             |
| Generalized Anxiety Disorder 7 Item (GAD-7)   | No Anxiety       | 18%         | 0.07        |
|                                               | Anxiety          | 33%         |             |
| Genetic Knowledge                             | Not All Correct  | 22%         | 0.86        |
|                                               | All Correct      | 21%         |             |
| Exome Sequencing Knowledge                    | Not All Correct  | 24%         | 0.46        |
|                                               | All Correct      | 19%         |             |

p-values generated by chi squared analysis

Abbreviations: Clinical Exome Sequencing (CES)

\*Analysis excludes in patients

**Table S4b.** Mean values of continuous variables stratified by those parents who had correct and incorrect interpretation of child's exome sequencing results.

| Variable                                | Interpretation                     | Incorrect |     | Correct |     | p-value      |
|-----------------------------------------|------------------------------------|-----------|-----|---------|-----|--------------|
|                                         |                                    | Mean      | SD  | Mean    | SD  |              |
| Parental Age in years                   |                                    | 40.9      | 9.1 | 40.0    | 9.0 | 0.45         |
| Child Age in years                      |                                    | 7.3       | 6.2 | 6.7     | 5.4 | 0.56         |
| Time from disclosure                    |                                    | 16.4      | 9.4 | 16.5    | 8.8 | 0.95         |
| Internal Health Locus of Control (IHLC) | higher=more control                | 13.5      | 3.6 | 12.2    | 3.0 | <b>0.03</b>  |
| Healthy Behaviors (HB)                  | higher= more healthy behaviors     | 21.8      | 4.3 | 24.4    | 4.4 | <b>0.001</b> |
| Negative Experiences                    | higher= more negative experiences  | 1.6       | 1.7 | 1.2     | 1.7 | 0.21         |
| Positive Experiences                    | higher=more positive experiences   | 1.9       | 2.1 | 3.2     | 2.8 | <b>0.007</b> |
| Non-Healthcare Utility                  | higher=more non-healthcare utility | 0.5       | 0.7 | 0.6     | 1.0 | 0.40         |
| Healthcare Utility                      | higher=more health utility         | 1.2       | 0.9 | 1.3     | 0.9 | 0.58         |

p-values generated by two sample t-test

Abbreviations: Standard Deviation (SD), Exome Sequencing (ES)

**Table S5a.** Frequency of reported satisfaction with genetic counseling by categorical variables of parental interpretation of results, demographics, testing experience and parental psychology. Analysis includes only parents of children who were evaluated in the clinic.

| Variable                                    | Category         | % Satisfied | p-value      |
|---------------------------------------------|------------------|-------------|--------------|
| <b>All</b>                                  |                  | <b>68%</b>  |              |
| Parental Intp. of CES Results               | Positive         | 68%         | 0.33         |
|                                             | Uncertain        | 60%         |              |
|                                             | Negative         | 76%         |              |
| Parental Misinterpretation of CES Results   | Correct          | 69%         | 0.48         |
|                                             | Incorrect        | 62%         |              |
| Parental Gender                             | Male             | 69%         | 0.92         |
|                                             | Female           | 67%         |              |
| Child Gender                                | Male             | 58%         | <b>0.005</b> |
|                                             | Female           | 80%         |              |
| Marital status                              | Married          | 64%         | 0.37         |
|                                             | Unmarried        | 80%         |              |
| Race/ Ethnicity                             | Non-White        | 70%         | 0.72         |
|                                             | White            | 67%         |              |
| Education                                   | < College        | 73%         | 0.42         |
|                                             | ≥ College        | 66%         |              |
| Employment                                  | Employed         | 64%         | 0.22         |
|                                             | Unemployed       | 74%         |              |
| Medical Geneticist                          | MD 1             | 65%         | 0.61         |
|                                             | MD 2             | 69%         |              |
|                                             | Others           | 79%         |              |
| Genetic Counselor Experience                | ≥ 5yr            | 76%         | <b>0.024</b> |
|                                             | < 5yr            | 58%         |              |
| Cost                                        | No cost          | 65%         | 0.45         |
|                                             | Cost             | 71%         |              |
| Results Disclosure                          | Phone            | 63%         | 0.28         |
|                                             | Other            | 72%         |              |
| Indication                                  | Single System    | 77%         | 0.34         |
|                                             | Multiple Systems | 63%         |              |
|                                             | Neurological     | 74%         |              |
| Decision Regret Scale (DRS)                 | Regret           | 50%         | <b>0.012</b> |
|                                             | No Regret        | 74%         |              |
| Personal Health Questionnaire (PHQ-9)       | Not Depressed    | 68%         | 0.81         |
|                                             | Depressed        | 71%         |              |
| Generalized Anxiety Disorder 7 Item (GAD-7) | No Anxiety       | 68%         | 1.00         |
|                                             | Anxiety          | 68%         |              |
| Genetic Knowledge                           | Not All Correct  | 71%         | 0.29         |
|                                             | All Correct      | 62%         |              |
| Exome Sequencing Knowledge                  | Not All Correct  | 71%         | 0.40         |
|                                             | All Correct      | 64%         |              |

p-values generated by chi squared analysis

Abbreviations: Clinical Exome Sequencing (CES)

\*Analysis excludes inpatients

**Table S5b.** Mean values of continuous variables stratified by those satisfied and not satisfied with genetic counseling experience.

|                                         |                                    | Satisfied |     | Not Satisfied |     | p-value      |
|-----------------------------------------|------------------------------------|-----------|-----|---------------|-----|--------------|
|                                         |                                    | Mean      | SD  | Mean          | SD  |              |
| Parental Age in years                   |                                    | 39.4      | 7.3 | 41.1          | 9.0 | 0.15         |
| Child Age in years                      |                                    | 6.2       | 5.1 | 7.8           | 6.0 | 0.06         |
| Time from disclosure                    |                                    | 17.1      | 9.1 | 17.8          | 8.7 | 0.67         |
| Internal Health Locus of Control (IHLC) | higher=more control                | 12.5      | 3.3 | 12.6          | 3.0 | 0.73         |
| Healthy Behaviors (HB)                  | higher= more healthy behaviors     | 24.7      | 4.3 | 22.8          | 4.4 | <b>0.006</b> |
| Negative Experiences                    | higher= more negative experiences  | 1.2       | 1.7 | 1.4           | 1.3 | 0.47         |
| Positive Experiences                    | higher=more positive experiences   | 3.4       | 2.8 | 2.2           | 2.3 | <b>0.005</b> |
| Healthcare Utility                      | higher=more health utility         | 1.3       | 0.9 | 1.2           | 0.8 | 0.28         |
| Non-Healthcare Utility                  | higher=more non-healthcare utility | 0.5       | 0.9 | 0.8           | 1.2 | <b>0.045</b> |

p-values generated by two sample t-test

Abbreviations: Standard Deviation (SD), Clinical Exome Sequencing (CES)



**Table S6a. Frequency of reported regret with decision (DSR) to have CES by categorical variables of parental interpretation of results, demographics, testing experience and parental psychology.**

| Variable                                      | Category         | % Regret   | p-value      |
|-----------------------------------------------|------------------|------------|--------------|
| <b>All</b>                                    |                  | <b>21%</b> |              |
| Parental Intp. of CES Results                 | Positive         | 15%        | 0.20         |
|                                               | Uncertain        | 15%        |              |
|                                               | Negative         | 27%        |              |
| Parental Misinterpretation of CES Results     | Male             | 19%        | 0.80         |
|                                               | Female           | 21%        |              |
| Child Gender                                  | Male             | 26%        | 0.13         |
|                                               | Female           | 16%        |              |
| Marital status                                | Married          | 23%        | 0.34         |
|                                               | Unmarried        | 14%        |              |
| Race/ Ethnicity                               | Non-White        | 28%        | 0.15         |
|                                               | White            | 18%        |              |
| Education                                     | < College        | 29%        | 0.09         |
|                                               | ≥ College        | 18%        |              |
| Employment                                    | Employed         | 20%        | 0.61         |
|                                               | Unemployed       | 23%        |              |
| Medical Geneticist                            | MD1              | 24%        | 0.80         |
|                                               | MD2              | 36%        |              |
|                                               | Others           | 19%        |              |
| Genetic Counselor Experience*                 | ≥ 5yr            | 16%        | <b>0.024</b> |
|                                               | < 5yr            | 32%        |              |
| Cost                                          | No cost          | 19%        | 0.50         |
|                                               | Cost             | 23%        |              |
| Location                                      | Clinic           | 25%        | 0.21         |
|                                               | In patient       | 15%        |              |
| Results Disclosure                            | Phone            | 25%        | 0.16         |
|                                               | Other            | 17%        |              |
| Indication                                    | Single System    | 28%        | 0.50         |
|                                               | Multiple Systems | 17%        |              |
|                                               | Neurological     | 21%        |              |
| Genetic Counseling Satisfaction Scale (GCSS)* | Regret           | 32%        | <b>0.012</b> |
|                                               | No Regret        | 17%        |              |
| Personal Health Questionnaire (PHQ-9)         | Not Depressed    | 17%        | <b>0.017</b> |
|                                               | Depressed        | 24%        |              |
| Generalized Anxiety Disorder 7 Item (GAD-7)   | No Anxiety       | 20%        | 0.79         |
|                                               | Anxiety          | 23%        |              |
| Genetic Knowledge                             | Not All Correct  | 22%        | 0.47         |
|                                               | All Correct      | 18%        |              |
| Exome Sequencing Knowledge                    | Not All Correct  | 21%        | 0.59         |
|                                               | All Correct      | 21%        |              |

p-values generated by chi squared analysis

Abbreviations: Clinical Exome Sequencing (CES)

\*Analysis excludes inpatients

**Table S6b. Mean values of continuous variables stratified by those with and with out regret about the decision to have WES.**

| Variable                                | Interpretation                     | No Regret |     | Regret |      | p-value      |
|-----------------------------------------|------------------------------------|-----------|-----|--------|------|--------------|
|                                         |                                    | Mean      | SD  | Mean   | SD   |              |
| Parental Age in years                   |                                    | 40.1      | 8.0 | 38.6   | 7.8  | 0.31         |
| Child Age in years                      |                                    | 6.8       | 5.6 | 6.9    | 5.2  | 1.00         |
| Time from disclosure                    |                                    | 16.7      | 9.2 | 16.4   | 21.7 | 0.93         |
| Internal Health Locus of Control (IHLC) | higher=more control                | 12.7      | 3.1 | 11.9   | 3.2  | 0.16         |
| Healthy Behaviors (HB)                  | higher= more healthy behaviors     | 23.8      | 4.5 | 24.4   | 4.7  | 0.49         |
| Negative Experiences                    | higher= more negative experiences  | 1.2       | 1.4 | 1.5    | 2.1  | 0.32         |
| Positive Experiences                    | higher=more positive experiences   | 3.2       | 2.8 | 1.7    | 2.2  | <b>0.002</b> |
| Non-Healthcare Utility                  | higher=more non-healthcare utility | 0.6       | 1.1 | 0.4    | 0.8  | 0.45         |
| Healthcare Utility                      | higher=more health utility         | 1.3       | 0.9 | 1.2    | 0.9  | 0.17         |

p-values generated by two sample t-test

Abbreviations: Standard Deviation (SD), Clinical Exome Sequencing (CES)

**Table S7a.** aMICRA uncertainty subdomain scores (outcome) and parental interpretation of child CES results (primary predictor) and other demographic and parental experience variables. ANOVA for categorical predictors, dummy reference variable created for predictor variables with three categories, two sample t-test for continuous predictors.

| Variable                                           | Reference                         | Estimate | 95% CI U      | 95% CI L | p-value          | N   |
|----------------------------------------------------|-----------------------------------|----------|---------------|----------|------------------|-----|
| Parental Intp. of CES Results                      | Pos vs Neg                        | 5.27     | 1.92          | 8.63     | <b>0.002</b>     | 176 |
|                                                    | Unc vs Neg                        | 3.72     | -0.09         | 7.53     | 0.06             |     |
|                                                    | Pos vs Unc                        | 1.56     | -2.12         | 5.23     | 0.40             |     |
| Parental Misinterpretation of CES Results          | Incorrect vs Correct              | 2.5      | -1.3          | 6.2      | 0.19             | 181 |
| Parental Gender                                    | Male vs Female                    | 1.87     | -2.74         | 6.47     | 0.42             | 183 |
| Child Gender                                       | Male vs Female                    | 1.90     | -1.16         | 4.96     | 0.22             | 183 |
| Parental Age in years                              |                                   | 0.19     | -0.16         | 0.53     | 0.29             | 181 |
| Child Age in years                                 |                                   | -0.27    | -0.80         | 0.26     | 0.32             | 183 |
| Marital status                                     | Married vs Unmarried              | 2.73     | -1.88         | 7.33     | 0.24             | 172 |
| Race/ Ethnicity                                    | Non-White vs White                | 0.49     | -2.79         | 3.76     | 0.77             | 183 |
| Education                                          | < College vs ≥ College            | -1.12    | -4.45         | 2.21     | 0.51             | 183 |
| Employment                                         | Employed vs Unemployed            | 1.21     | -1.97         | 4.39     | 0.45             | 183 |
| Time in months between results returned and survey |                                   | -0.02    | -0.20         | 0.149    | 0.78             | 181 |
| Medical Geneticist                                 | MD1 vs All                        | -0.08    | -4.73         | 4.57     | 0.97             | 176 |
|                                                    | MD2 vs All                        | -0.54    | -5.38         | 4.29     | 0.83             |     |
| Genetic Counselor experience*                      | ≥ 5yr vs <5yr                     | -1.05    | -4.73         | 2.63     | 0.57             | 143 |
| Reported cost                                      | No cost vs cost                   | -1.98    | -5.25         | 1.28     | 0.23             | 175 |
| Reported method of results disclosure              | Phone vs other                    | -0.99    | -4.05         | 2.08     | 0.53             | 183 |
| Location                                           | In Patient vs Clinic              | -2.04    | -5.72         | 1.65     | 0.28             | 183 |
| Indication                                         | Single system vs Neurological     | -2.22    | -6.39         | 1.95     | 0.29             | 183 |
|                                                    | Multiple systems vs Neurological  | -2.45    | -6.38         | 1.49     | 0.22             |     |
|                                                    | Single system vs Multiple systems | 0.22     | -4.83         | 5.28     | 0.93             | 183 |
| Decision Regret Scale (DRS)                        | No Regret vs Regret               | -2.25    | -6.05         | 1.54     | 0.24             | 177 |
| Genetic Counseling Satisfaction Scale (GCSS)*      | Not Satisfied vs Satisfied        | -0.26    | -4.21         | 3.68     | 0.90             | 139 |
| Personal Health Questionnaire (PHQ-9)              | Not Depressed vs Depressed        | -14.07   | <b>-18.21</b> | -9.92    | <b>&lt;.0001</b> | 174 |
| Generalized Anxiety Disorder 7 Item (GAD-7)        | No Anxiety vs Anxiety             | -12.68   | <b>-16.95</b> | -8.41    | <b>&lt;.0001</b> | 174 |
| Genetic Knowledge                                  | Not All Correct vs All Correct    | -0.64    | -3.99         | 2.72     | 0.71             | 182 |
| Exome Sequencing Knowledge                         | Not All Correct vs All Correct    | -1.05    | -4.12         | 2.02     | 0.50             | 182 |
| Internal Health Locus of Control (IHLC)            | higher=more control               | 0.17     | -0.31         | 0.66     | 0.48             | 177 |
| Healthy Behaviors (HB)                             | higher= more healthy behaviors    | -0.72    | -1.04         | -0.39    | <b>&lt;.0001</b> | 180 |

Abbreviations: Adapted Multidimensional Impact of Cancer Risk Assessment (aMICRA), Clinical Exome Sequencing (CES), 95% Confidence Interval Upper and Lower (95% CI U, L).

p-values from ANOVA for categorical predictors, dummy reference variable created for predictor variables with three categories, two sample t-test for continuous predictors.

\*\*Analysis excludes in patients

**Table S7b.** aMICRA distress subdomain scores (outcome) and parental interpretation of child CES results (primary predictor) and other demographic and parental experience variables. ANOVA for categorical predictors, dummy reference variable created for predictor variables with three categories, two sample t-test for continuous predictors.

| Variable                                           | Reference                         | Estimate | 95% CI U | 95% CI L | p-value          | N   |
|----------------------------------------------------|-----------------------------------|----------|----------|----------|------------------|-----|
| Parental Intp. of CES Results                      | Pos vs Neg                        | -0.05    | -1.96    | 1.86     | 0.96             | 177 |
|                                                    | Unc vs Neg                        | 1.14     | -1.04    | 3.31     | 0.30             |     |
|                                                    | Pos vs Unc                        | -1.19    | -3.28    | 0.90     | 0.26             |     |
| Parental Misinterpretation of CES Results          | Incorrect vs Correct              | 1.2      | -0.8     | 3.2      | 0.24             | 184 |
| Parental Gender                                    | Male vs Female                    | -1.36    | -5.04    | 2.32     | 0.47             | 188 |
| Child Gender                                       | Male vs Female                    | 0.81     | -1.66    | 3.28     | 0.52             | 188 |
| Parental Age in years                              |                                   | 0.01     | -0.14    | 0.16     | 0.90             | 188 |
| Child Age in years                                 |                                   | -0.34    | -0.57    | -0.11    | <b>0.005</b>     | 173 |
| Marital status                                     | Married vs Unmarried              | 2.61     | -1.21    | 6.42     | 0.18             | 177 |
| Race/ Ethnicity                                    | Non-White vs White                | -1.88    | -4.52    | 0.75     | 0.16             | 187 |
| Education                                          | < College vs $\geq$ College       | -0.55    | -3.21    | 2.11     | 0.68             | 188 |
| Employment                                         | Employed vs Unemployed            | 0.29     | -2.27    | 2.84     | 0.83             | 188 |
| Time in months between results returned and survey |                                   | -0.01    | -0.22    | 0.83     | 0.05             | 188 |
| Medical Geneticist                                 | MD1 vs All                        | 0.86     | -2.95    | 4.68     | 0.66             | 181 |
|                                                    | MD2 vs All                        | 2.71     | -1.24    | 6.66     | 0.18             |     |
| Genetic Counselor experience*                      | $\geq$ 5yr vs <5yr                | -1.83    | -4.63    | 0.98     | 0.20             | 145 |
| Reported cost                                      | No cost vs cost                   | -0.78    | -3.45    | 1.89     | 0.57             | 179 |
| Reported method of results disclosure              | Phone vs other                    | -3.29    | -5.71    | -0.87    | 0.01             | 187 |
| Location                                           | In Patient vs Clinic              | 0.67     | -2.26    | 3.59     | 0.65             | 188 |
| Indication                                         | Single system vs Neurological     | -0.78    | -4.14    | 2.58     | 0.65             | 188 |
|                                                    | Multiple systems vs Neurological  | -0.33    | -3.51    | 2.85     | 0.84             |     |
|                                                    | Single system vs Multiple systems | -0.45    | -4.53    | 3.62     | 0.83             |     |
| Decision Regret Scale (DRS)                        | No Regret vs Regret               | -0.23    | -3.30    | 2.83     | 0.88             | 181 |
| Genetic Counseling Satisfaction Scale (GCSS)*      | Not Satisfied vs Satisfied        | 0.57     | -2.48    | 3.63     | 0.71             | 140 |
| Personal Health Questionnaire (PHQ-9)              | Not Depressed vs Depressed        | -12.16   | -15.54   | -8.77    | <b>&lt;.0001</b> | 179 |
| Generalized Anxiety Disorder 7 Item (GAD-7)        | No Anxiety vs Anxiety             | -9.89    | -13.33   | -6.46    | <b>&lt;.0001</b> | 181 |
| Genetic Knowledge                                  | Not All Correct vs All Correct    | -0.81    | -3.50    | 1.88     | 0.55             | 187 |
| Exome Sequencing Knowledge                         | Not All Correct vs All Correct    | -1.82    | -4.28    | 0.63     | 0.15             | 187 |
| Internal Health Locus of Control (IHLC)            | higher=more control               | 0.40     | 0.01     | 0.80     | 0.05             | 181 |
| Healthy Behaviors (HB)                             | higher= more healthy behaviors    | -0.64    | -0.90    | -0.38    | <b>&lt;.0001</b> | 185 |

Abbreviations: Adapted Multidimensional Impact of Cancer Risk Assessment (aMICRA), Clinical Exome Sequencing (CES), 95% Confidence Interval Upper and Lower (95% CI U, L).

p-values from ANOVA for categorical predictors, dummy reference variable created for predictor variables with three categories, two sample t-test for continuous predictors.

\*\*Analysis excludes in patients

**Table S7c.** aMICRA positivity subdomain scores (outcome) and parental interpretation of child CES results (primary predictor) and other demographic and parental experience variables. ANOVA for categorical predictors, dummy reference variable created for predictor variables with three categories, two sample t-test for continuous predictors.

| Variable                                           | Reference                         | Estimate | 95% CI U | 95% CI L | p-value       | N   |
|----------------------------------------------------|-----------------------------------|----------|----------|----------|---------------|-----|
| Parental Intp. of CES Results                      | Pos vs Neg                        | -0.05    | -1.96    | 1.86     | 0.96          | 177 |
|                                                    | Unc vs Neg                        | 1.14     | -1.04    | 3.31     | 0.30          |     |
|                                                    | Pos vs Unc                        | -1.19    | -3.28    | 0.90     | 0.26          |     |
| Parental Misinterpretation of CES Results          | Incorrect vs Correct              | 1.2      | -0.8     | 3.2      | 0.24          | 184 |
| Parental Gender                                    | Male vs Female                    | 1.04     | -1.42    | 3.51     | 0.40          | 184 |
| Child Gender                                       | Male vs Female                    | 1.01     | -0.66    | 2.67     | 0.23          | 184 |
| Parental Age in years                              |                                   | 0.07     | -0.04    | 0.17     | 0.20          | 184 |
| Child Age in years                                 |                                   | 0.19     | 0.03     | 0.35     | <b>0.017</b>  | 169 |
| Marital status                                     | Married vs Unmarried              | -0.97    | -3.57    | 1.62     | 0.46          | 174 |
| Race/ Ethnicity                                    | Non-White vs White                | 0.56     | -1.22    | 2.35     | 0.53          | 184 |
| Education                                          | < College vs ≥ College            | 1.12     | -0.69    | 2.92     | 0.22          | 184 |
| Employment                                         | Employed vs Unemployed            | -0.72    | -2.45    | 1.01     | 0.41          | 184 |
| Time in months between results returned and survey |                                   | 0.03     | -0.07    | 0.12     | 0.59          | 184 |
| Medical Geneticist                                 | MD1 vs All                        | 1.25     | -1.31    | 3.81     | 0.34          | 177 |
|                                                    | MD2 vs All                        | 1.63     | -1.03    | 4.29     | 0.23          |     |
| Genetic Counselor experience*                      | ≥ 5yr vs <5yr                     | 0.71     | -1.16    | 2.58     | 0.45          | 143 |
| Reported cost                                      | No cost vs cost                   | 0.12     | -1.67    | 1.91     | 0.90          | 176 |
| Reported method of results disclosure              | Phone vs other                    | -0.62    | -2.62    | 1.37     | 0.54          | 184 |
| Location                                           | In Patient vs Clinic              | 0.72     | -0.95    | 2.39     | 0.40          | 183 |
| Indication                                         | Single system vs Neurological     | 2.60     | 0.38     | 4.83     | 0.02          | 184 |
|                                                    | Multiple systems vs Neurological  | 0.43     | -1.68    | 2.54     | 0.69          |     |
|                                                    | Single system vs Multiple systems | 2.17     | -0.52    | 4.86     | 0.11          |     |
| Decision Regret Scale (DRS)                        | No Regret vs Regret               | -3.90    | -5.92    | -1.89    | <b>0.0002</b> | 178 |
| Genetic Counseling Satisfaction Scale (GCSS)*      | Not Satisfied vs Satisfied        | 2.02     | -0.02    | 4.06     | 0.05          | 138 |
| Personal Health Questionnaire (PHQ-9)              | Not Depressed vs Depressed        | -2.67    | -5.26    | -0.08    | <b>0.044</b>  | 174 |
| Generalized Anxiety Disorder 7 Item (GAD-7)        | No Anxiety vs Anxiety             | -2.04    | -4.53    | 0.45     | 0.11          | 177 |
| Genetic Knowledge                                  | Not All Correct vs All Correct    | 0.40     | -1.41    | 2.21     | 0.66          | 183 |
| Exome Sequencing Knowledge                         | Not All Correct vs All Correct    | 1.21     | -0.44    | 2.86     | 0.15          | 183 |
| Internal Health Locus of Control (IHLC)            | higher=more control               | -0.14    | -0.41    | 0.12     | 0.28          | 178 |
| Healthy Behaviors (HB)                             | higher= more healthy behaviors    | -0.15    | -0.34    | 0.03     | 0.10          | 181 |

Abbreviations: Adapted Multidimensional Impact of Cancer Risk Assessment (aMICRA), Clinical Exome Sequencing (CES), 95% Confidence Interval Upper and Lower (95% CI U, L).

p-values from ANOVA for categorical predictors, dummy reference variable created for predictor variables with three categories, two sample t-test for continuous predictors.

\*\*Analysis excludes in patients

## SUPPLEMENTARY METHODS

### Study Instrument

The survey went through four revisions, incorporating feedback from three additional GCs, a genetic research coordinator and two psychologists before the start of the study. The survey included demographic questions as well as questions about the process of testing, including counselling and resources utilized, cost of the test, and time needed to make a decision. Questions regarding emotions experienced at the time of results disclosure, parental perceived medical and non-medical utility of results, with whom results were shared, positive and negative experiences, and genetic knowledge were developed for this study. The parent's interpretation of the child's clinical exome sequencing (CES) results was assessed by a single multiple-choice question. Measures previously validated in multiple adult patient populations were used to assess respondent's psychological state including depression (Personal Health Questionnaire-9 (PHQ-9))(1) and anxiety (Generalized Anxiety Disorder 7 Item (GAD-7))(2) . Health perception and behaviors were measures with the validated instrument internal health locus of control (IHLC)) (3) and a scale that was developed for healthy behaviors (HB). Regret about the decision to have CES and satisfaction with genetic counseling were assessed with validated measures: decision regret scale (DRS) (4) and genetic counseling satisfaction scale (GCSS)(5). The psychological impact of genetic test results was evaluated via an adapted version of the multidimensional impact of cancer risk assessment (aMICRA) to assess CES test results with subdomains of positivity (reverse scored), uncertainty and distress experienced related to results (6) (Table S1). This MICRA scale was developed and validated in a population of women undergoing

1  
2  
3 breast cancer genetic testing, it has not been validated in other populations. The survey  
4  
5 took 20 minutes on average to complete.  
6

### 7 **Statistical analysis**

8  
9  
10 Descriptive statistics are presented in frequencies for categorical variables and  
11  
12 means and standard deviations for quantitative variables. Associations between  
13  
14 parental interpretations of child's CES results and binary variables were assessed  
15  
16 through Chi-square tests. Results for the DRS and GCSS scales were skewed and  
17  
18 therefore were analyzed as binary outcomes: DRS: no regret (for any of the questions)  
19  
20 versus some regret (for any of the questions), GCSS: completely satisfied (for all  
21  
22 questions) versus some dissatisfaction (for any of the questions). The GCSS outcome  
23  
24 was assessed only for patients who were seen in clinic and therefore interacted with a  
25  
26 GC in the pre-test session. Associations between parental interpretation of their child's  
27  
28 test results and continuous variables were assessed by ANOVA.  
29  
30  
31

32  
33 A multiple linear regression model of the association between parental  
34  
35 interpretation of child's CES results and aMICRA score was fit, adjusting for  
36  
37 confounders. A variable was considered a potential confounder if it was not theorized to  
38  
39 be in the causal pathway between parental interpretation of the child's results  
40  
41 (exposure) and aMICRA score (outcome), and was associated with both the exposure  
42  
43 and the outcome at a p-value threshold of 0.2.  
44  
45

46  
47 Analysis was completed in duplicate excluding the 77 parents who completed the  
48  
49 survey within 12 months of receiving their child's CES results. The results were similar  
50  
51 and for simplicity only the analysis of the full cohort is shown.  
52

53  
54 The analysis was completed including the 54 fathers from the paired parents  
55  
56  
57  
58  
59  
60

1  
2  
3 using a generalized estimating equation to adjust for paired parent response  
4  
5 correlations. The results were similar and for simplicity only the analysis without the 54  
6  
7 fathers is presented.  
8  
9

10 A p-value of 0.05 was considered relevant for our exploratory analysis. Statistical  
11  
12 analysis was completed in SAS (7).  
13  
14  
15  
16

## 17 REFERENCES

- 18
- 19 1. Kroenke K, Spitzer RL, Williams JB. The PHQ-9: validity of a brief depression severity  
20 measure. *J Gen Intern Med* 2001; 16: 606-613.
- 21 2. Spitzer RL, Kroenke K, Williams JB, Lowe B. A brief measure for assessing generalized  
22 anxiety disorder: the GAD-7. *Arch Intern Med* 2006; 166: 1092-1097.
- 23 3. Wallston KA, Wallston BS, DeVellis R. Development of the Multidimensional Health  
24 Locus of Control (MHLC) Scales. *Health Educ Monogr* 1978; 6: 160-170.
- 25 4. Brehaut JC, O'Connor AM, Wood TJ et al. Validation of a decision regret scale. *Med*  
26 *Decis Making* 2003; 23: 281-292.
- 27 5. DeMarco TA, Peshkin BN, Mars BD, Tercyak KP. Patient satisfaction with cancer  
28 genetic counseling: a psychometric analysis of the Genetic Counseling Satisfaction Scale. *J*  
29 *Genet Couns* 2004; 13: 293-304.
- 30 6. Cella D, Hughes C, Peterman A et al. A brief assessment of concerns associated with  
31 genetic testing for cancer: the Multidimensional Impact of Cancer Risk Assessment (MICRA)  
32 questionnaire. *Health Psychol* 2002; 21: 564-572.
- 33 7. SAS Institute Inc. SAS 9.4 [computer program]. Cary, NC: SAS Institute Inc., 2014.  
34  
35  
36  
37  
38  
39  
40  
41  
42  
43  
44  
45  
46  
47  
48  
49  
50  
51  
52  
53  
54  
55  
56  
57  
58  
59  
60



1  
2  
3  
4  
5  
6  
7  
8  
9  
10  
11  
12  
13  
14  
15  
16  
17  
18  
19  
20  
21  
22  
23  
24  
25  
26  
27  
28  
29  
30  
31  
32  
33  
34  
35  
36  
37  
38  
39  
40  
41  
42  
43  
44  
45  
46  
47  
48  
49  
50  
51  
52  
53  
54  
55  
56  
57  
58  
59  
60

**Figure S1:** Flow diagram of participant enrollment. Final enrollment rate 57%

For Review Only

Examining the Effects of WES      Investigators: Julia Wynn, MS and Wendy Chung, MD, PhD  
WES Post-Disclosure, Parental (retro)

Enter your study ID (provided in the email): \_\_\_\_\_

What is your date of birth? \_\_\_\_/\_\_\_\_/\_\_\_\_ (mm/dd/yyyy)

What is your gender?

- Male
- Female
- Other, please specify \_\_\_\_\_

What is your marital status?

- Never married
- Married or living as married with partner
- Separated
- Divorced
- Widowed

Are you of Hispanic, Latino or Spanish origin?

- Yes
- No

Which of the following best describes your race? (check all that apply)

- White
- Black or African American
- Asian
- American Indian or Alaska Native
- Native Hawaiian or other Pacific Islander
- More than one race
- Other race, please specify \_\_\_\_\_

Counting yourself, how many members currently make up your household?: \_\_\_\_\_

What is the highest level of education you completed?

- Less than 9th grade
- Some high school but did not graduate
- Graduated high school or completed GED
- Some post high school training including vocational, associate degree of some college
- College degree
- Graduate degree (Master's degree or Doctoral degree)

Which of the following best describes your current employment status, main daily activities and/or responsibilities?

- Employed full-time (including full-time self-employment)
- Employed part-time (including part-time self-employment)
- Keeping house or raising children full-time
- Unemployed
- Retired
- Disabled
- Other, please specify \_\_\_\_\_

What is the medical condition that first brought your child (your family) to genetics?:

---

***For the remainder of this survey, we will refer to this as the medical condition when asking you questions about it and your experience in genetics.***

Examining the Effects of WES      Investigators: Julia Wynn, MS and Wendy Chung, MD, PhD  
WES Post-Disclosure, Parental (retro)

What do you think is the cause of the medical condition? (check all that apply)

- A mutation in a gene/ a genetic cause
- Medication exposure (either a medication your child took or one your child was exposed to during the pregnancy)
- Environmental exposure (either an exposure your child had or one your child was exposed to during the pregnancy)
- Infection (either an infection your child had or one your child was exposed to during the pregnancy)
- My fault – poor care of my child's health
- Stress
- Difficult delivery, not enough oxygen to the brain at the time of my child's birth
- Bad luck
- I don't know

How many children do you have with this medical condition (currently living or deceased)? \_\_\_\_\_

How many children do you have without this medical condition (currently living or deceased)? \_\_\_\_\_

If you have any children without this medical condition, how likely is it that they will develop this medical condition?

- Very unlikely
- Unlikely
- Somewhat unlikely
- Undecided
- Somewhat likely
- Likely
- Very likely
- N/A, I don't have any children without this medical condition

If you decide to have more children, how likely it is that the child will have or develop this medical condition?

- Very unlikely
- Unlikely
- Somewhat unlikely
- Undecided
- Somewhat likely
- Likely
- Very likely

Do you have this medical condition?

- Yes
- No
- Uncertain

If you do not have the medical condition, how likely are you to develop this medical condition in the future?

- Very unlikely
- Unlikely
- Somewhat unlikely
- Undecided
- Somewhat likely
- Likely
- Very likely

Examining the Effects of WES      Investigators: Julia Wynn, MS and Wendy Chung, MD, PhD  
WES Post-Disclosure, Parental (retro)

**Your child had a genetic test called whole exome sequencing (WES) to try to identify the genetic cause of his/her medical condition. Please think back to when you first learned about WES. Think about your experiences during this time to answer the questions for this section.**

Before your child had WES, had he/she had any other genetic testing for the medical condition?

- Yes
- No
- I cannot remember

Which medical professionals did you speak with to learn about WES and make the decision to have the test for your child? (check all that apply)

- Clinical geneticist (a genetics doctor)
- Genetic counselor
- Nurse
- Pediatrician
- Primary care doctor/ general practitioner
- Cardiologist
- Oncologist
- Other, please specify \_\_\_\_\_

How did you communicate with these medical professionals? (check all that apply)

- In person, at an appointment
- By email
- By phone

Did you have more than one appointment with your geneticist or genetic counselor to discuss WES before you decided to have testing for your child?

- No, I had one appointment
- Yes, I had two appointments
- Yes, I had more than two appointments
- N/A, I did not have an appointment with a geneticist or genetic counselor
- I cannot remember

What other resources outside of your child's doctors or healthcare providers did you use to learn more about WES? (check all that apply)

- Educational materials provided by the genetic counselor/ medical professionals
- Educational videos provided by the genetic counselor/ medical professionals
- Internet searches
- Educational websites
- Magazine articles
- TV
- Books
- Friends/ Family
- Other, please specify \_\_\_\_\_

When did you decide to pursue WES for your child?

- The same day the test was offered to me.
- I took several (2-6) days before deciding to pursue the test.
- I took longer than a week but less than a month before deciding to pursue the test.
- I took more than a month before deciding to pursue the test.
- I took several months or longer before deciding to pursue the test.
- I cannot remember.

Examining the Effects of WES      Investigators: Julia Wynn, MS and Wendy Chung, MD, PhD  
 WES Post-Disclosure, Parental (retro)

How much time did you spend discussing WES testing with your health care provider(s) (doctor, nurse, and genetic counselor) before you decided to have the test for your child?

*Please think of all the time that was spent even if it was over several appointments or in an appointment and by phone or email.*

- Less than 15 minutes
- 15-30 minutes
- 30-60 minutes
- 60-90 minutes
- 90-120 minutes
- More than 2 hours
- I cannot remember

How much money did you personally have to pay out of pocket to have WES?

- \$0, the cost was covered entirely by my insurance
- More than \$0, but less than or equal to \$100
- More than \$100, but less than or equal to \$500
- More than \$500, but less than or equal to \$1000
- More than \$1000
- I had to pay some money but I cannot recall how much

***Please think about when you received the results of your child's WES and the information you learned about your child's medical condition when answering this next set of questions.***

What were the results of your child's WES testing?

- Positive test results. A genetic mutation that is the cause of my child's medical condition was identified.
- Negative genetic test results. No genetic mutations were identified but there still could be a genetic mutation that causes my child's medical condition.
- Negative genetic test results. No genetic mutation was identified and this means that my child's medical condition is not genetic.
- Uncertain genetic test results. A genetic variant was identified but it is not certain whether or not the genetic variant is the cause of my child's medical condition.
- The results of the genetic testing are not clear to me.

What was your reaction when you received the results of the WES? (check all that apply)

- |                                    |                                                |
|------------------------------------|------------------------------------------------|
| <input type="checkbox"/> Happy     | <input type="checkbox"/> Curious               |
| <input type="checkbox"/> Content   | <input type="checkbox"/> Fearful               |
| <input type="checkbox"/> Surprised | <input type="checkbox"/> Nervous/ Anxious      |
| <input type="checkbox"/> Relieved  | <input type="checkbox"/> Hopeful               |
| <input type="checkbox"/> Guilty    | <input type="checkbox"/> Frustrated            |
| <input type="checkbox"/> Depressed | <input type="checkbox"/> Confused              |
| <input type="checkbox"/> Worried   | <input type="checkbox"/> Other, please specify |
| <input type="checkbox"/> Excited   | _____                                          |

Examining the Effects of WES      Investigators: Julia Wynn, MS and Wendy Chung, MD, PhD  
 WES Post-Disclosure, Parental (retro)

How did you FIRST learn about the WES test results?

- By phone
- In a follow up visit
- In a letter
- I do not remember
- Other, please specify \_\_\_\_\_

Which health care provider FIRST told you about the WES test results?

- A genetic counselor
- A genetics doctor
- Both a genetic counselor and a genetics doctor
- I do not remember
- Other, please specify \_\_\_\_\_

What other resources other than your doctors or healthcare providers did you use to learn more about the WES results? Please indicate the helpfulness of each of these resources.

|                                                                                | N/A, did not use this resource | Very Helpful          | Somewhat Helpful      | Helpful               | Not Helpful           |
|--------------------------------------------------------------------------------|--------------------------------|-----------------------|-----------------------|-----------------------|-----------------------|
| Educational materials provided by the genetic counselor/ medical professionals | <input type="radio"/>          | <input type="radio"/> | <input type="radio"/> | <input type="radio"/> | <input type="radio"/> |
| Educational videos provided by the genetic counselor/ medical professionals    | <input type="radio"/>          | <input type="radio"/> | <input type="radio"/> | <input type="radio"/> | <input type="radio"/> |
| Internet searches                                                              | <input type="radio"/>          | <input type="radio"/> | <input type="radio"/> | <input type="radio"/> | <input type="radio"/> |
| Educational websites                                                           | <input type="radio"/>          | <input type="radio"/> | <input type="radio"/> | <input type="radio"/> | <input type="radio"/> |
| Patient support groups                                                         | <input type="radio"/>          | <input type="radio"/> | <input type="radio"/> | <input type="radio"/> | <input type="radio"/> |
| Facebook                                                                       | <input type="radio"/>          | <input type="radio"/> | <input type="radio"/> | <input type="radio"/> | <input type="radio"/> |
| Friends/ Family                                                                | <input type="radio"/>          | <input type="radio"/> | <input type="radio"/> | <input type="radio"/> | <input type="radio"/> |

Please answer the questions below about you experience with your genetic counselor. Please read each statement below carefully and tell us how much you agree or disagree with each statement by indicating strongly agree to

Examining the Effects of WES      Investigators: Julia Wynn, MS and Wendy Chung, MD, PhD  
 WES Post-Disclosure, Parental (retro)

strongly disagree.

|                                                                                                                   | Strongly agree        | Agree somewhat        | Uncertain             | Disagree somewhat     | Strongly disagree     |
|-------------------------------------------------------------------------------------------------------------------|-----------------------|-----------------------|-----------------------|-----------------------|-----------------------|
| My genetic counselor seemed to understand the stress I was facing.                                                | <input type="radio"/> |
| My genetic counselor helped me to identify what I needed to know to make decisions about what would happen to me. | <input type="radio"/> |
| The counseling session was about the right length of time.                                                        | <input type="radio"/> |
| My genetic counselor was truly concerned about my well-being.                                                     | <input type="radio"/> |
| The genetic counseling session was valuable to me.                                                                | <input type="radio"/> |

Please think about the decision you made to have WES for your child after talking to your healthcare provider (doctor, nurse, health professional, etc.). Please read each statement below and tell us how much you agree or disagree with each statement by indicating strongly agree to strongly disagree.

|                                                                | Strongly Agree        | Agree                 | Neither Agree nor Disagree | Disagree              | Strongly Disagree     |
|----------------------------------------------------------------|-----------------------|-----------------------|----------------------------|-----------------------|-----------------------|
| It was the right decision.                                     | <input type="radio"/> | <input type="radio"/> | <input type="radio"/>      | <input type="radio"/> | <input type="radio"/> |
| I regret the choice that was made.                             | <input type="radio"/> | <input type="radio"/> | <input type="radio"/>      | <input type="radio"/> | <input type="radio"/> |
| I would make the same choice if I had to do it all over again. | <input type="radio"/> | <input type="radio"/> | <input type="radio"/>      | <input type="radio"/> | <input type="radio"/> |
| The choice did me a lot of harm.                               | <input type="radio"/> | <input type="radio"/> | <input type="radio"/>      | <input type="radio"/> | <input type="radio"/> |
| The decision was a wise one.                                   | <input type="radio"/> | <input type="radio"/> | <input type="radio"/>      | <input type="radio"/> | <input type="radio"/> |

What was positive about the experience of WES testing? (check all that apply)

- The results provided an answer for my child's medical condition.
- The results provided reassurance that my child's medical condition is likely not genetic.
- The results helped my family.
- The results helped us to determine who else might be at risk for the medical condition.
- The results provided closure for our family.
- The results have made me hopeful about possible treatments in the future.
- The results helped me know what to expect in the future.
- The results helped me to identify other individuals with the same condition.
- The results allow me to identify the scientists and doctors who are specialists in this condition.
- The results allow my child to participate in research on my child's condition.
- The results allow me to follow the new scientific developments about my child's condition.
- The results allow me to feel more in control.
- Nothing was positive about the experience.
- Other, please specify \_\_\_\_\_

Examining the Effects of WES      Investigators: Julia Wynn, MS and Wendy Chung, MD, PhD  
 WES Post-Disclosure, Parental (retro)

What was negative about the experience of WES testing? (check all that apply)

- The results have not helped my child.
- The results have created more questions about my child's medical condition.
- I worry about the things I now know could happen in the future.
- Knowing what the future is likely to hold is depressing.
- I have had to have difficult conversations with relatives.
- The results have caused conflict or arguments with my partner.
- The results have caused conflict or arguments with my other family members.
- I feel like I have lost privacy.
- It has negatively affected my child's medical insurance.
- It has negatively affected my child's life insurance.
- It has negatively affected my child's ability to get a job.
- It has negatively affected my child's to have a spouse or long term partner.
- Nothing was negative about the experience.
- Other, please specify \_\_\_\_\_

Have the results of the WES affected your child's medical care in the any of the follow ways? (check all that apply)

- My child saw a doctor to discuss the implications of the test results.
- My child saw a doctor who specializes in this specific condition.
- My child had an additional medical evaluation or test to determine if my child has features of the medical condition.
- My child plans to have regular screening for the medical condition.
- The results have not changed my child's medical care.
- Other, please specify \_\_\_\_\_

Will /did the results of WES help to guide your reproductive decisions? (check all that apply)

- Yes, I now know that my future children are not at risk to have the medical condition.
- Yes, I was or will be able to pursue testing to prevent having (another) child affected with the medical condition.
- Yes, I elected not to have (additional) biological children.
- No, the results did not guide my reproductive decisions.
- I don't know.
- Other, please specify \_\_\_\_\_

Please indicate if you shared the WES results with any of the following individuals. (check all that apply)

- |                                                    |                                                      |
|----------------------------------------------------|------------------------------------------------------|
| <input type="checkbox"/> My primary care physician | <input type="checkbox"/> My friends                  |
| <input type="checkbox"/> My child's pediatrician   | <input type="checkbox"/> My employer                 |
| <input type="checkbox"/> My spouse/ partner        | <input type="checkbox"/> My health insurance         |
| <input type="checkbox"/> My children               | <input type="checkbox"/> I did not share my results  |
| <input type="checkbox"/> My siblings               | <input type="checkbox"/> Other, please specify _____ |
| <input type="checkbox"/> My extended family        |                                                      |
| <input type="checkbox"/> My parents                |                                                      |

If you shared the results with your family members what was their reaction?

- N/A, I did not share my child's results with any family members.
- All of my family members were grateful to learn about the results.
- Some of my family members were grateful to learn about the results but some were upset.
- All of my family members were upset to learn about the results.

Please tell us a little more about your family members' specific reactions: \_\_\_\_\_

\_\_\_\_\_



Examining the Effects of WES      Investigators: Julia Wynn, MS and Wendy Chung, MD, PhD  
WES Post-Disclosure, Parental (retro)

Please indicate how the results of WES affected you in ways unrelated to medical management. (check all that apply)

- I or my child was able to connect with other families/ individuals with the same medical condition online or in a support group.
- I or my child met another person with the medical condition.
- I or my child attended a meeting for individuals with the medical condition.
- I or my child started a foundation/ support group for the medical condition.
- I learned that my child is the only person known to have the medical condition.
- I or my child joined a research study.
- None of the above.

If you could have chosen when in your life to learn about the WES results, when would that have been?

- I would not change when I learned about the results.
- I wish I knew about the results before I had my child(ren).
- I wish I knew about the results immediately after my child was diagnosed with the medical condition.
- I wish I knew about the results as soon as my child became an adult (18 years).
- I wish I never learned about the results.
- Other, please specify when you would have liked to learn about your results. \_\_\_\_\_

If you had known your child's WES results before you had children, would the results have changed your decision to have children?

- No, the results would not have changed my decision to have biological children.
- Yes, I would have chosen not to have biological children.
- Yes, I would have chosen to pursue reproductive options to prevent my children from inheriting the medical condition.

Examining the Effects of WES      Investigators: Julia Wynn, MS and Wendy Chung, MD, PhD  
 WES Post-Disclosure, Parental (retro)

The questions below are about some specific responses you may have had after receiving your child's WES test results. Please answer every question regardless of whether you were given a positive or negative test result. Please indicate whether you have experienced each statement never, rarely, sometimes, or often, by indicating the corresponding number.

|                                                                                                                                  | Never                 | Rarely                | Sometimes             | Often                 |
|----------------------------------------------------------------------------------------------------------------------------------|-----------------------|-----------------------|-----------------------|-----------------------|
| Feeling upset about the test results.                                                                                            | <input type="radio"/> | <input type="radio"/> | <input type="radio"/> | <input type="radio"/> |
| Feeling sad about the test results.                                                                                              | <input type="radio"/> | <input type="radio"/> | <input type="radio"/> | <input type="radio"/> |
| Feeling anxious or nervous about the test results.                                                                               | <input type="radio"/> | <input type="radio"/> | <input type="radio"/> | <input type="radio"/> |
| Feeling guilty about the test results.                                                                                           | <input type="radio"/> | <input type="radio"/> | <input type="radio"/> | <input type="radio"/> |
| Feeling relieved about the test results.                                                                                         | <input type="radio"/> | <input type="radio"/> | <input type="radio"/> | <input type="radio"/> |
| Feeling happy about the test results.                                                                                            | <input type="radio"/> | <input type="radio"/> | <input type="radio"/> | <input type="radio"/> |
| Feeling a loss of control.                                                                                                       | <input type="radio"/> | <input type="radio"/> | <input type="radio"/> | <input type="radio"/> |
| Having problems enjoying life because of the test results.                                                                       | <input type="radio"/> | <input type="radio"/> | <input type="radio"/> | <input type="radio"/> |
| Worrying about my risk of getting the medical condition.                                                                         | <input type="radio"/> | <input type="radio"/> | <input type="radio"/> | <input type="radio"/> |
| Being uncertain about what the test results mean about my child's health risk.                                                   | <input type="radio"/> | <input type="radio"/> | <input type="radio"/> | <input type="radio"/> |
| Being uncertain about what the test results mean for my child(ren) and/or family's risk.                                         | <input type="radio"/> | <input type="radio"/> | <input type="radio"/> | <input type="radio"/> |
| Having difficulty making decisions about screening or prevention (e.g. having preventive surgery or getting medical tests done). | <input type="radio"/> | <input type="radio"/> | <input type="radio"/> | <input type="radio"/> |
| Understanding clearly my choices for disease prevention or early detection.                                                      | <input type="radio"/> | <input type="radio"/> | <input type="radio"/> | <input type="radio"/> |
| Feeling frustrated that there are no definite prevention guidelines for me or my children.                                       | <input type="radio"/> | <input type="radio"/> | <input type="radio"/> | <input type="radio"/> |
| Thinking about the test results has affected my work or my family life.                                                          | <input type="radio"/> | <input type="radio"/> | <input type="radio"/> | <input type="radio"/> |
| Feeling concerned about how the test results will affect my child's insurance status.                                            | <input type="radio"/> | <input type="radio"/> | <input type="radio"/> | <input type="radio"/> |
| Having difficulty talking about the test results with my family members.                                                         | <input type="radio"/> | <input type="radio"/> | <input type="radio"/> | <input type="radio"/> |
| Feeling that my family has been supportive during the genetic counseling and testing process.                                    | <input type="radio"/> | <input type="radio"/> | <input type="radio"/> | <input type="radio"/> |
| Feeling satisfied with family communication about the genetic test results.                                                      | <input type="radio"/> | <input type="radio"/> | <input type="radio"/> | <input type="radio"/> |
| Worrying that the genetic counseling and testing process has brought about conflict.                                             | <input type="radio"/> | <input type="radio"/> | <input type="radio"/> | <input type="radio"/> |
| Feeling regret about getting the test results.                                                                                   | <input type="radio"/> | <input type="radio"/> | <input type="radio"/> | <input type="radio"/> |
| Feeling that the genetic test results have made it harder to cope with my medical condition.                                     | <input type="radio"/> | <input type="radio"/> | <input type="radio"/> | <input type="radio"/> |
| Feeling that the genetic test results have made it easier to cope with my child's medical condition.                             | <input type="radio"/> | <input type="radio"/> | <input type="radio"/> | <input type="radio"/> |
| Worry about the possibility of my other children getting the medical condition.                                                  | <input type="radio"/> | <input type="radio"/> | <input type="radio"/> | <input type="radio"/> |
| Feeling guilty about possibly passing on the disease risk to my child(ren).                                                      | <input type="radio"/> | <input type="radio"/> | <input type="radio"/> | <input type="radio"/> |

Examining the Effects of WES      Investigators: Julia Wynn, MS and Wendy Chung, MD, PhD  
 WES Post-Disclosure, Parental (retro)

**Please answer the following questions thinking about how you feel.  
 These symptoms may or may not be related to the WES testing.**

Over the last 2 weeks, how often were you bothered by any of the following problems? Please indicate not at all to nearly every day.

|                                                                                                                                                                         | Not at all            | Several days          | More than half the days | Nearly every day      |
|-------------------------------------------------------------------------------------------------------------------------------------------------------------------------|-----------------------|-----------------------|-------------------------|-----------------------|
| Little interest or pleasure in doing things.                                                                                                                            | <input type="radio"/> | <input type="radio"/> | <input type="radio"/>   | <input type="radio"/> |
| Feeling down, depressed or hopeless.                                                                                                                                    | <input type="radio"/> | <input type="radio"/> | <input type="radio"/>   | <input type="radio"/> |
| Trouble falling or staying asleep, or sleeping too much.                                                                                                                | <input type="radio"/> | <input type="radio"/> | <input type="radio"/>   | <input type="radio"/> |
| Feeling tired or having little energy.                                                                                                                                  | <input type="radio"/> | <input type="radio"/> | <input type="radio"/>   | <input type="radio"/> |
| Poor appetite or overeating.                                                                                                                                            | <input type="radio"/> | <input type="radio"/> | <input type="radio"/>   | <input type="radio"/> |
| Feeling bad about yourself – or that you are failure and have let yourself or your family down.                                                                         | <input type="radio"/> | <input type="radio"/> | <input type="radio"/>   | <input type="radio"/> |
| Trouble concentrating on things, such as reading the newspaper or watching television.                                                                                  | <input type="radio"/> | <input type="radio"/> | <input type="radio"/>   | <input type="radio"/> |
| Moving or speaking so slowly that other people could have noticed, or the opposite being so fidgety or restless that you have been moving around a lot more than usual. | <input type="radio"/> | <input type="radio"/> | <input type="radio"/>   | <input type="radio"/> |
| Thoughts that you would be better off dead, or of hurting yourself in some way.                                                                                         | <input type="radio"/> | <input type="radio"/> | <input type="radio"/>   | <input type="radio"/> |

Over the last 2 weeks, how often were you bothered by any of the following problems? Please indicate not at all to nearly every day.

|                                                    | Not at all            | Several days          | More than half the days | Nearly every day      |
|----------------------------------------------------|-----------------------|-----------------------|-------------------------|-----------------------|
| Feeling nervous, anxious or on edge.               | <input type="radio"/> | <input type="radio"/> | <input type="radio"/>   | <input type="radio"/> |
| Not being able to stop or control worrying.        | <input type="radio"/> | <input type="radio"/> | <input type="radio"/>   | <input type="radio"/> |
| Worrying too much about different things.          | <input type="radio"/> | <input type="radio"/> | <input type="radio"/>   | <input type="radio"/> |
| Trouble relaxing.                                  | <input type="radio"/> | <input type="radio"/> | <input type="radio"/>   | <input type="radio"/> |
| Being so restless that it is hard to sit still.    | <input type="radio"/> | <input type="radio"/> | <input type="radio"/>   | <input type="radio"/> |
| Becoming easily annoyed or irritable.              | <input type="radio"/> | <input type="radio"/> | <input type="radio"/>   | <input type="radio"/> |
| Feeling afraid as if something awful might happen. | <input type="radio"/> | <input type="radio"/> | <input type="radio"/>   | <input type="radio"/> |

Do you have a diagnosis of a psychiatric or emotional condition?

- No
- Yes
- No, not currently but have been diagnosed in the past with a psychiatric condition.

Examining the Effects of WES      Investigators: Julia Wynn, MS and Wendy Chung, MD, PhD  
 WES Post-Disclosure, Parental (retro)

What psychiatric or emotional condition do you have or did you have in the past? (check all that apply)

- Depression  
 Anxiety  
 Bipolar disorder  
 Schizophrenia  
 Panic disorder  
 Attention deficit/ hyperactive disorder (ADHD)  
 Obsessive compulsive disorder  
 Eating disorder  
 Other, please specify \_\_\_\_\_

For each answer, choose what best describes your feelings. Please indicate strongly agree to strongly disagree.

|                                                                                  | Strongly agree        | Moderately agree      | Moderately disagree   | Strongly disagree     |
|----------------------------------------------------------------------------------|-----------------------|-----------------------|-----------------------|-----------------------|
| If I get sick, it is my own behavior which determines how soon I get well again. | <input type="radio"/> | <input type="radio"/> | <input type="radio"/> | <input type="radio"/> |
| I am in control of my health.                                                    | <input type="radio"/> | <input type="radio"/> | <input type="radio"/> | <input type="radio"/> |
| When I get sick, I am to blame.                                                  | <input type="radio"/> | <input type="radio"/> | <input type="radio"/> | <input type="radio"/> |
| The main thing which affects my health is what I do myself.                      | <input type="radio"/> | <input type="radio"/> | <input type="radio"/> | <input type="radio"/> |
| If I take care of myself, I can avoid illness.                                   | <input type="radio"/> | <input type="radio"/> | <input type="radio"/> | <input type="radio"/> |
| If I take the right actions, I can stay healthy.                                 | <input type="radio"/> | <input type="radio"/> | <input type="radio"/> | <input type="radio"/> |

Please tell us about how you care for your health. Please indicate strongly agree to strongly disagree.

|                                                                          | Strongly agree        | Moderately agree      | Moderately disagree   | Strongly disagree     |
|--------------------------------------------------------------------------|-----------------------|-----------------------|-----------------------|-----------------------|
| I make sure I get plenty of rest.                                        | <input type="radio"/> | <input type="radio"/> | <input type="radio"/> | <input type="radio"/> |
| I make sure I get regular exercise.                                      | <input type="radio"/> | <input type="radio"/> | <input type="radio"/> | <input type="radio"/> |
| I try very hard to avoid having too much stress in my life.              | <input type="radio"/> | <input type="radio"/> | <input type="radio"/> | <input type="radio"/> |
| I make sure I eat a healthy diet.                                        | <input type="radio"/> | <input type="radio"/> | <input type="radio"/> | <input type="radio"/> |
| I make sure to get regular medical check-ups.                            | <input type="radio"/> | <input type="radio"/> | <input type="radio"/> | <input type="radio"/> |
| I make sure to follow up on recommendations that my doctors make.        | <input type="radio"/> | <input type="radio"/> | <input type="radio"/> | <input type="radio"/> |
| I make sure that I take time to relax.                                   | <input type="radio"/> | <input type="radio"/> | <input type="radio"/> | <input type="radio"/> |
| I try to keep up with the latest recommendations on how to stay healthy. | <input type="radio"/> | <input type="radio"/> | <input type="radio"/> | <input type="radio"/> |

Examining the Effects of WES      Investigators: Julia Wynn, MS and Wendy Chung, MD, PhD  
WES Post-Disclosure, Parental (retro)

**Please answer each true and false question to the best of your ability.**

Fifty percent of inherited genetic information is passed down from each parent.

- True
- False

All individuals with a genetic mutation will eventually develop the genetic disease.

- True
- False

If a woman learned from genetic testing that she does not have a breast cancer gene mutation, then that means that she will never develop breast cancer.

- True
- False

A healthy couple can have a child with a genetic condition.

- True
- False

Whole exome sequencing (WES) is able to detect all genetic mutations.

- True
- False

A negative result for whole exome sequencing (WES) indicates that an individual definitely does not have a genetic condition.

- True
- False

A positive result for whole exome sequencing (WES) indicates that an individual's medical condition is caused by specific genetic mutation.

- True
- False

When an individual is found to have a genetic condition, his/her relatives may also be at risk for the condition.

- True
- False

Would you be willing to participate in a 60 minute phone interview about your experience with WES?

- Yes
- No

**Thank you for taking the time to complete this survey. We will be sending you a \$20 amazon gift card to show our appreciation.**
